# Supplementary material for: An organic anion template: a 24-nucleus silver cluster encapsulating a squarate dimer
Source: Royal Society of Chemistry journal article supplement (doi:10.1039/c5cc02782a), 2015-01-01
Supplement: c5cc02782a1.pdf [file c5cc02782a1.pdf]

## Supporting Information

### **Organic Anion Template: a 24-Nuclearity Silver Cluster Encapsulating a Squarate Dimer**

Kuan-Guan Liu, Su-Kun Chen, Yu-Mei Lin\*, Quan-Ming Wang\*

*State Key Lab of Physical Chemistry of Solid Surfaces, Department of Chemistry,  
College of Chemistry and Chemical Engineering, Xiamen, 361005, P. R. China  
linyum@xmu.edu.cn; qmwang@xmu.edu.cn*

## Materials and Methods.

All of the reagents and solvents employed were commercially available and used as received without further purification. The C, H, and N microanalyses were carried out with a CE instruments EA 1110 elemental analyzer. The FT-IR spectra were recorded from KBr pellets in the range 4000-400  $\text{cm}^{-1}$  with a Nicolet AVATAR FT-IR360 spectrometer. Diffuse reflectance spectra were collected on a finely ground sample with a Cary 500 spectrophotometer equipped with a 110 mm diameter integrating sphere; the spectra were measured from 200 to 800 nm by using barium sulfate ( $\text{BaSO}_4$ ) as a standard with 100% reflectance. The  $^{13}\text{C}$  cross-polarized magic-angle spinning (CPMAS) experiments were performed for **1**. Solid NMR spectra were recorded on Bruker Biospin Avance 400 MHz NMR spectrometer (Avance III, Bruker Biospin, Switzerland), operating at 400.2 MHz for  $^1\text{H}$  frequency and 100.6 MHz for  $^{13}\text{C}$  using Bruker 4.0 mm DVT probe. All spectra were recorded at 12.0 kHz Magic Angle Spinning (MAS) frequency. CPMAS experiments for **1** were performed at 25  $^\circ\text{C}$ . The  $^{13}\text{C}$  CPMAS spectra were recorded with spectral width of 500 ppm, 2k data points, and 7k scans.

**X-ray Crystallography.** Intensity data of  $1 \cdot 2\text{CH}_3\text{CN}$  were collected on an Oxford Gemini S Ultra system (Mo  $\text{K}\alpha$ ). Absorption corrections were applied by using the program CrysAlis (multi-scan). The structures were solved by direct methods, and non-hydrogen atoms except disordered components were refined anisotropically by least-squares on  $F_2$  using the SHELXTL program. The hydrogen atoms of organic ligands were generated geometrically, while no attempt was made to locate hydrogen atoms of solvent molecules.

## Characterization

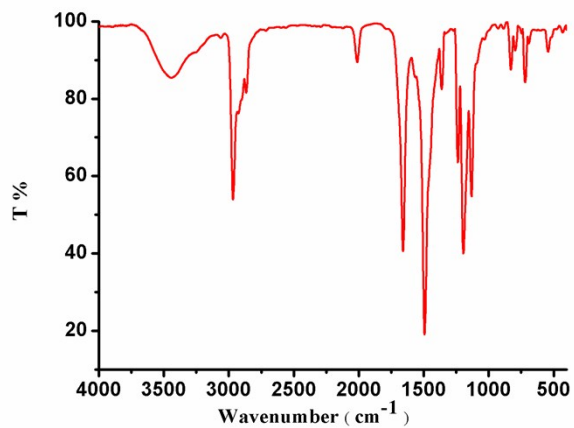

**Figure S1.** The IR spectrum of **1**.

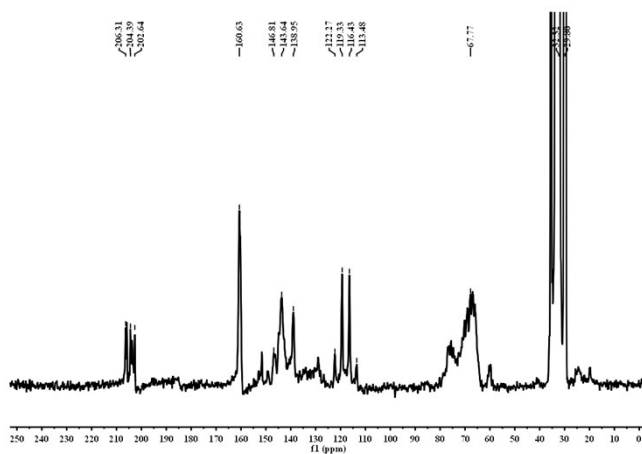

**Figure S2.** Solid-state <sup>13</sup>C NMR spectrum of **1**. 204.4 (m, C<sub>4</sub>O<sub>4</sub><sup>2-</sup>), 160.6 (s, CF<sub>3</sub>COO<sup>-</sup>), 143.6 (m, C≡Cbu<sup>l</sup>), 122.3, 119.3, 116.4, 113.5 (q, CF<sub>3</sub>), 67.8 (m, C≡Cbu<sup>l</sup>), 32.3 (m, CH<sub>3</sub> and C(CH<sub>3</sub>)<sub>3</sub>) ppm.

**Table S1.** Crystal data and structure refinement for **1**.

| <i>Compound</i>                                                                                       | <b>1</b>                                                                                          |
|-------------------------------------------------------------------------------------------------------|---------------------------------------------------------------------------------------------------|
| Chemical formula                                                                                      | C <sub>116</sub> H <sub>150</sub> F <sub>12</sub> N <sub>2</sub> O <sub>16</sub> Ag <sub>24</sub> |
| Formula weight                                                                                        | 4645.25                                                                                           |
| Crystal system                                                                                        | Monoclinic                                                                                        |
| Space group                                                                                           | P2(1)/n                                                                                           |
| <i>a</i> , Å                                                                                          | 23.5527(7)                                                                                        |
| <i>b</i> , Å                                                                                          | 20.9694(8)                                                                                        |
| <i>c</i> , Å                                                                                          | 29.3460(9)                                                                                        |
| <i>α</i> , deg                                                                                        | 90                                                                                                |
| <i>β</i> , deg                                                                                        | 95.231(3)                                                                                         |
| <i>γ</i> , deg                                                                                        | 90                                                                                                |
| <i>V</i> , Å <sup>3</sup>                                                                             | 14433.2(8)                                                                                        |
| <i>Z</i>                                                                                              | 4                                                                                                 |
| $\rho_{\text{calc}}$ , g/cm <sup>3</sup>                                                              | 2.135                                                                                             |
| $\mu$ , mm <sup>-1</sup>                                                                              | 3.238                                                                                             |
| Reflections collected                                                                                 | 68602                                                                                             |
| Independent reflections                                                                               | 28306                                                                                             |
| <i>R</i> <sub>int</sub>                                                                               | 0.0437                                                                                            |
| Reflections <i>I</i> > 2σ( <i>I</i> )                                                                 | 28306                                                                                             |
| Parameters                                                                                            | 1720                                                                                              |
| GOF on <i>F</i> <sup>2</sup>                                                                          | 1.054                                                                                             |
| <i>R</i> <sub>1</sub> <sup>a</sup> / <i>wR</i> <sub>2</sub> <sup>b</sup> ( <i>I</i> > 2σ( <i>I</i> )) | 0.0489 / 0.0860                                                                                   |
| <i>R</i> <sub>1</sub> <sup>a</sup> / <i>wR</i> <sub>2</sub> <sup>b</sup> ( <i>all</i> )               | 0.0762 / 0.0937                                                                                   |

$$^a R_1 = [\sum \text{abs}(\text{abs}(\text{Fo}) - \text{abs}(\text{Fc}))] / [\sum \text{abs}(\text{Fo})]. \quad ^b wR_2 = [\sum (w(\text{Fo}^2 - \text{Fc}^2)^2) / \sum (w(\text{Fo}^2)^2)]^{0.5}.$$

**Table S2.** Mean deviation from planes [Å], the dihedral angles [°] of the four parallel planes and the mean interplanar separations for **1**.<sup>[a]</sup>

| Mean deviation from planes [Å]  |              |                         |              |
|---------------------------------|--------------|-------------------------|--------------|
| Plane 1                         | 0.0025       | Plane 2                 | 0.0082       |
| Plane 3                         | 0.0074       | Plane 4                 | 0.0020       |
| The dihedral angles [°]         |              |                         |              |
| $\alpha_{1,2}$                  | 178.31(0.14) | $\alpha_{1,3}$          | 177.07(0.14) |
| $\alpha_{1,4}$                  | 176.54(0.03) | $\alpha_{2,3}$          | 176.49(0.19) |
| $\alpha_{2,4}$                  | 176.99(0.14) | $\alpha_{3,4}$          | 178.04(0.14) |
| Mean interplanar separation [Å] |              |                         |              |
| <i>d</i> <sub>1,2</sub>         | 2.957        | <i>d</i> <sub>2,3</sub> | 3.108        |
| <i>d</i> <sub>3,4</sub>         | 2.961        | <i>d</i> <sub>1,4</sub> | 9.022        |

[a] The mean interplanar separation are calculated by Mercury with the mean distance between the atom in one plane and the other.

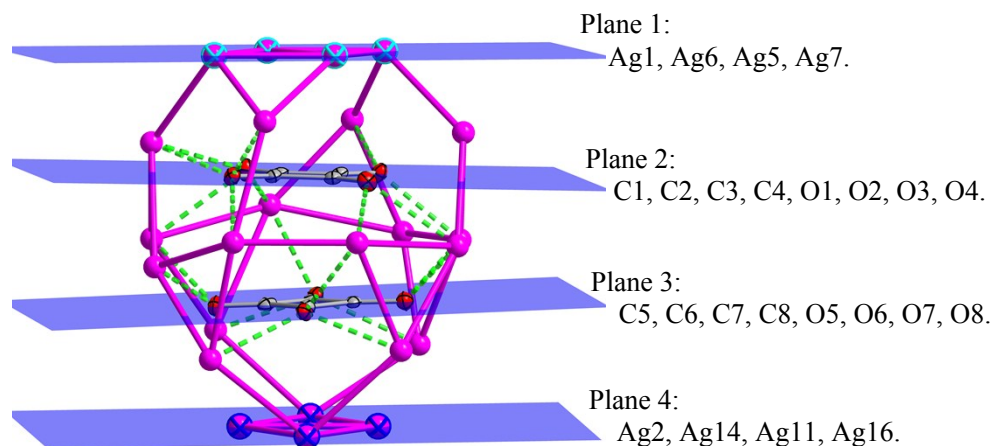

**Figure S3.** The locations of four nearly parallel planes in the core structure of cluster **1**.

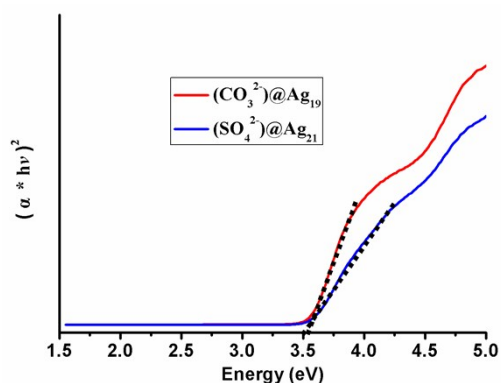

**Figure S4.** The solid UV-vis diffuse reflectance spectra of  $[\text{Ag}_{19}(\text{C}\equiv\text{C}'\text{Bu})_{16}(\text{CO}_3^{2-})]\text{BF}_4$  ( $(\text{CO}_3^{2-})@Ag_{19}$ ) and  $[\text{Ag}_{21}(\text{C}\equiv\text{C}'\text{Bu})_{18}(\text{SO}_4)]\text{BF}_4$  ( $(\text{SO}_4^{2-})@Ag_{21}$ ).

**Table S3.** Selected Bond lengths [ $\text{\AA}$ ] and angles [ $^\circ$ ] for **1**.

| Bond lengths [ $\text{\AA}$ ] |          |             |          |
|-------------------------------|----------|-------------|----------|
| O(1)-Ag(15)                   | 2.800(4) | O(5)-Ag(3)  | 2.809(4) |
| O(1)-Ag(20)                   | 2.687(4) | O(5)-Ag(10) | 2.653(4) |
| O(1)-Ag(21)                   | 2.828(4) | O(5)-Ag(19) | 2.609(4) |
| O(2)-Ag(9)                    | 2.417(4) | O(6)-Ag(4)  | 2.442(4) |
| O(2)-Ag(12)                   | 2.833(4) | O(6)-Ag(12) | 2.779(4) |
| O(2)-Ag(20)                   | 2.816(4) | O(7)-Ag(9)  | 2.806(4) |
| O(3)-Ag(8)                    | 2.550(4) | O(7)-Ag(22) | 2.846(4) |
| O(3)-Ag(17)                   | 2.592(4) | O(7)-Ag(23) | 2.645(4) |
| O(4)-Ag(3)                    | 2.560(4) | O(8)-Ag(8)  | 2.578(5) |
| O(4)-Ag(13)                   | 2.682(4) | O(8)-Ag(13) | 2.624(5) |
| C(1)-O(1)                     | 1.263(7) | C(2)-O(2)   | 1.265(7) |
| C(3)-O(3)                     | 1.269(7) | C(4)-O(4)   | 1.263(7) |

|           |          |           |          |
|-----------|----------|-----------|----------|
| C(5)-O(5) | 1.263(7) | C(6)-O(6) | 1.254(8) |
| C(7)-O(7) | 1.257(7) | C(8)-O(8) | 1.253(8) |
| C(1)-C(4) | 1.450(9) | C(1)-C(2) | 1.453(8) |
| C(2)-C(3) | 1.442(9) | C(3)-C(4) | 1.456(8) |
| C(5)-C(8) | 1.451(9) | C(5)-C(6) | 1.468(9) |
| C(6)-C(7) | 1.460(9) | C(7)-C(8) | 1.480(9) |

Angles [°]

|                |          |                |          |
|----------------|----------|----------------|----------|
| O(1)-C(1)-C(4) | 135.8(6) | O(1)-C(1)-C(2) | 134.4(6) |
| O(2)-C(2)-C(3) | 136.3(6) | O(2)-C(2)-C(1) | 133.3(6) |
| O(3)-C(3)-C(2) | 133.9(6) | O(3)-C(3)-C(4) | 136.2(6) |
| O(4)-C(4)-C(1) | 136.4(6) | O(4)-C(4)-C(3) | 133.7(6) |
| O(5)-C(5)-C(8) | 134.8(6) | O(5)-C(5)-C(6) | 134.4(6) |
| O(6)-C(6)-C(7) | 134.6(6) | O(6)-C(6)-C(5) | 135.8(6) |
| O(7)-C(7)-C(6) | 134.8(6) | O(7)-C(7)-C(8) | 135.2(6) |
| O(8)-C(8)-C(5) | 135.5(6) | O(8)-C(8)-C(7) | 134.8(6) |
| C(4)-C(1)-C(2) | 89.8(5)  | C(3)-C(2)-C(1) | 90.4(5)  |
| C(2)-C(3)-C(4) | 89.9(5)  | C(1)-C(4)-C(3) | 89.9(5)  |
| C(8)-C(5)-C(6) | 90.8(5)  | C(7)-C(6)-C(5) | 89.7(5)  |
| C(6)-C(7)-C(8) | 89.9(5)  | C(5)-C(8)-C(7) | 89.6(5)  |

---
